# Supplementary material for: Photophysical dynamics of a binuclear Cu(i)-emitter on the fs to μs timescale, in solid phase and in solution
Source: Royal Society of Chemistry journal article supplement (doi:10.1039/c7cp05791a), 2017-01-01
Supplement: c7cp05791a1.pdf [file c7cp05791a1.pdf]

## Supporting Information:

### Photophysical Dynamics of a Binuclear Cu(I)-Emitter on the fs to $\mu$ s Timescale, in Solid Phase and in Solution

#### Table of Contents

Tab. S1: Decadic molar extinction coefficient  $\epsilon$  of **1** in solution.

Fig. S1: Absorbance and luminescence spectra of **1** in toluene and acetonitrile at room temperature.

Fig. S2: Absorbance spectrum of **1** in solid state as neat film at room temperature.

Fig. S3: Luminescence spectra of **1** in KBr matrix and as neat film at room temperature.

Fig. S4: Static excitation/emission spectrum of **1** in toluene at room temperature.

Fig. S5: Static excitation/emission spectrum of **1** in acetonitrile at room temperature.

Fig. S6: Static excitation/emission spectrum of **1** in dichloromethane at room temperature.

Fig. S7: Static excitation/emission spectrum of **1** as neat film at room temperature.

Fig. S8: Static excitation/emission spectrum of **1** as neat pellet at room temperature.

Fig. S9: HOMO and LUMO of **1**; spin density in the  $T_1$  state.

Fig. S10: Ground state FTIR spectrum in  $CCl_4$  and KBr-pellet in comparison with calculated vibrational spectrum at room temperature; calculated molecular structure of **1** in the electronic ground state.

Fig. S11: Selected time traces of fs transient absorption (TA) and kinetic analysis on **1** in toluene and acetonitrile solution at room temperature.

Tab. S2: Luminescence lifetimes of **1** in toluene at room temperature.

Tab. S3: Luminescence lifetimes of **1** in acetonitrile at room temperature.

Fig. S12: Temporal evolution of step-scan FTIR absorbance changes of **1** as KBr-pellet at room temperature and biexponential fits.

Tab. S4: Characterization of vibrational modes of **1**.

Tab. S5: Change of geometrical parameters with transition from the  $S_0$  structure to the  $T_1$  structure.

Fig. S13: Bond lengths and angles in the central  $Cu_2I_2$  unit in the  $S_0$  and  $T_1$  electronic state.

Fig. S14: Ground state FTIR spectrum of **1** as KBr-pellet; step-scan FTIR difference spectrum in the first microsecond after excitation; change in absorbance through temperature rise.

Tab. S6: Luminescence lifetimes of **1** as KBr-pellet at room temperature.

Tab. S7: Luminescence lifetimes of **1** as neat film at room temperature.

Fig. S15: Ground state FTIR spectrum of **1** as KBr-pellet at room temperature and at 20 K.

Fig. S16: Step-scan FTIR spectrum of **1** as KBr-pellet in the first microsecond after excitation, at room temperature and at 20 K.

Fig. S17: Step-scan FTIR difference spectrum of **1** as KBr-pellet at 20 K in the first 500 ns after excitation; DFT calculation of  $T_1$  state minus  $2 \times S_0$  state; ground state FTIR spectrum (KBr-pellet at 20 K).

Fig. S18: Temporal evolution of step-scan FTIR absorbance changes and kinetic analysis of **1** as KBr-pellet at 20 K.

Fig. S19: Selected transients of fs-TA and kinetic analysis on **1** as neat film at room temperature.

Fig. S20: Wavepackets: Fast Fourier transform of fs-TA data of **1** in neat film at room temperature; Representation of low-frequency vibrational modes in the electronic ground state of **1**.

Fig. S21: Step-scan FTIR difference spectrum of **1** as KBr pellet and as neat film at room temperature in the first 100 ns after excitation.

Tab. S8: Vertical excitation energies for the  $S_0$  geometry and corresponding oscillator strengths.

Fig. S22: Calculated vertical excitation energies for  $S_0$ - and  $T_1$ -geometry.

Tab. S1: Decadic molar extinction coefficient  $\epsilon$  ( $\text{L mol}^{-1} \text{cm}^{-1}$ ) of **1** at given wavelengths in solution.

| solvent         | $\epsilon$ ( $\text{L mol}^{-1} \text{cm}^{-1}$ )<br>at 350 nm | $\epsilon$ ( $\text{L mol}^{-1} \text{cm}^{-1}$ )<br>at 250 nm |
|-----------------|----------------------------------------------------------------|----------------------------------------------------------------|
| toluene         | 6000                                                           | 17700                                                          |
| acetonitrile    | 4200                                                           | 78400                                                          |
| dichloromethane | 7000                                                           | 72000                                                          |

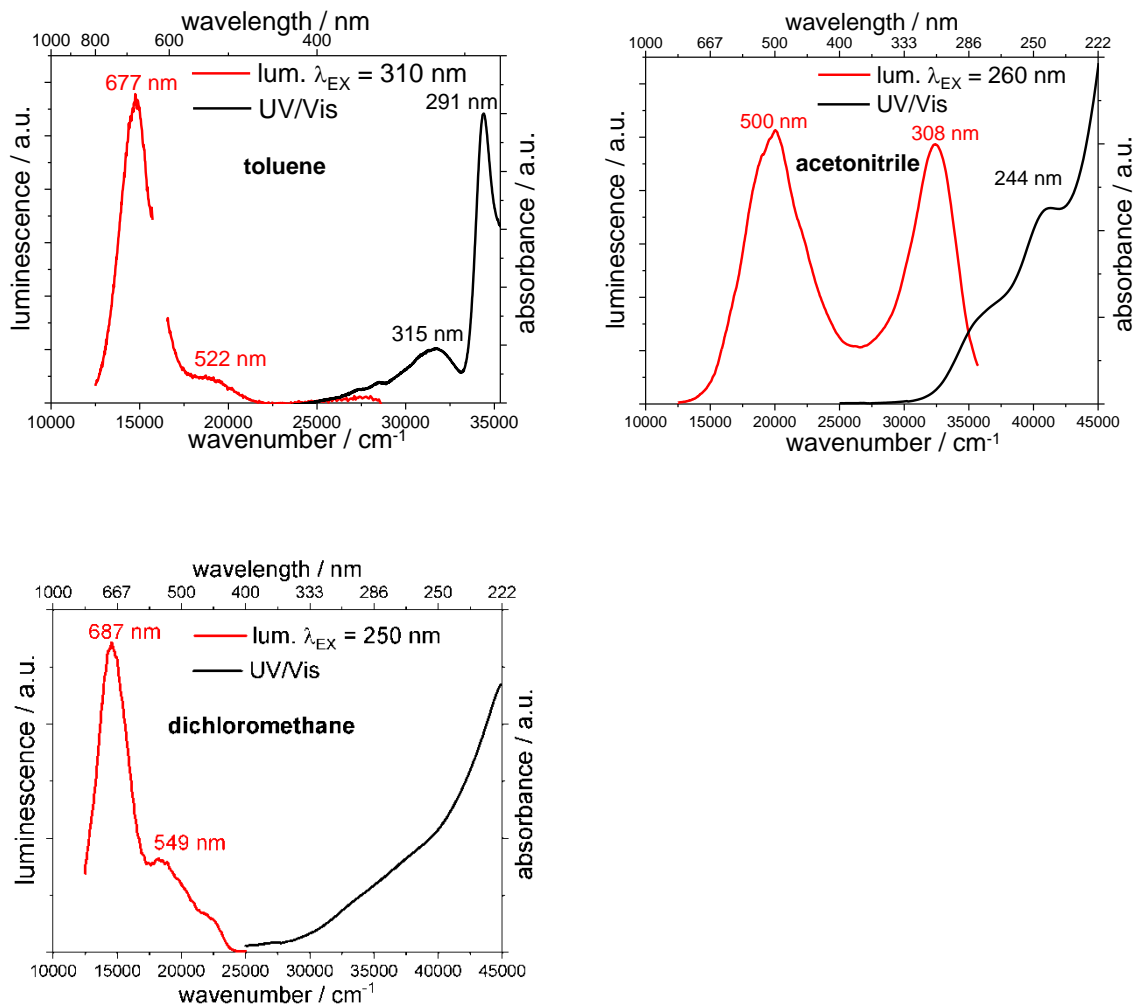

Fig. S1: Absorbance (black) and luminescence (red) spectra of **1** in toluene (9  $\mu\text{mol/L}$ ), acetonitrile (11  $\mu\text{mol/L}$ ), dichloromethane (51  $\mu\text{mol/L}$ ); solvent contributions subtracted (room temperature).

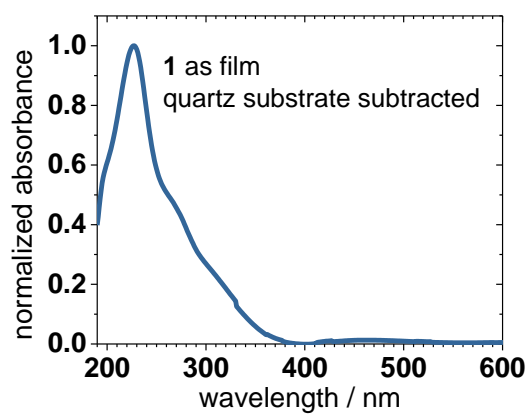

Fig. S2: Normalized static absorbance spectrum of **1** in solid state as neat film at room temperature; substrate contributions subtracted.

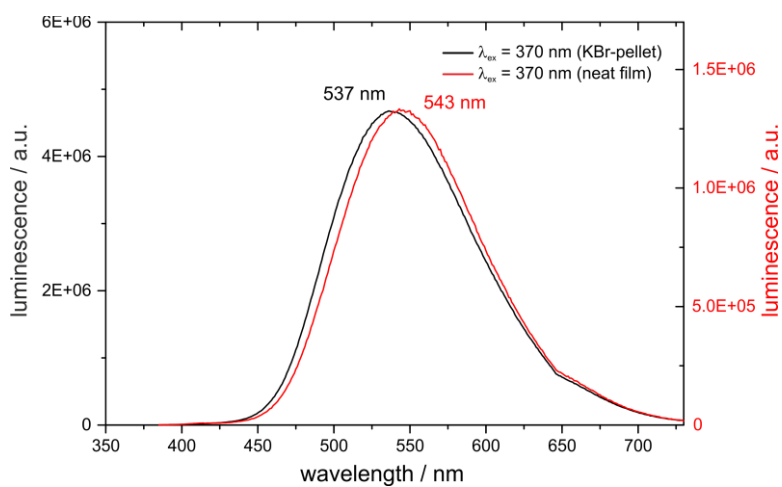

Fig. S3: Luminescence spectrum of **1** in KBr matrix (black) and luminescence spectrum of **1** as neat film (red) at room temperature.

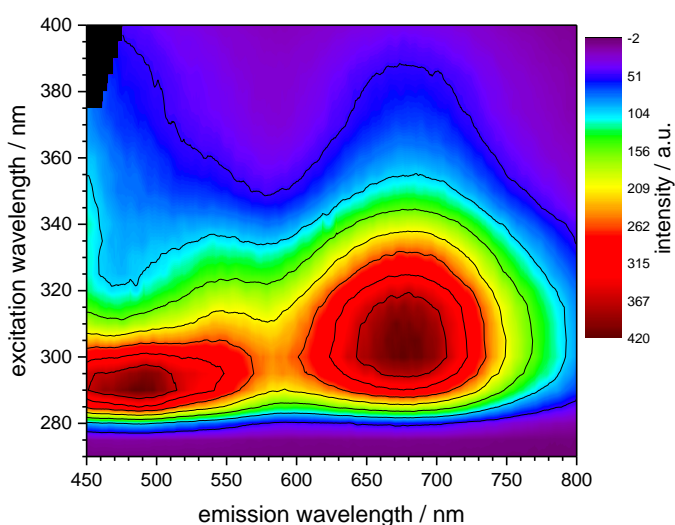

Fig. S4: Static excitation/emission spectrum of **1** in toluene solution at room temperature, concentration set to 0.02 mg/mL (14  $\mu\text{mol/L}$ ). Note that at high concentration used in Ref. [1] (ca. 1 mmol/L) (i) the apparent luminescence peak at 677 nm is blue-shifted to ca. 600 nm, and (ii) the excitation spectrum (for luminescence at 600 nm) is significantly red-shifted with respect to the peak at ca. 310 nm at low concentration.

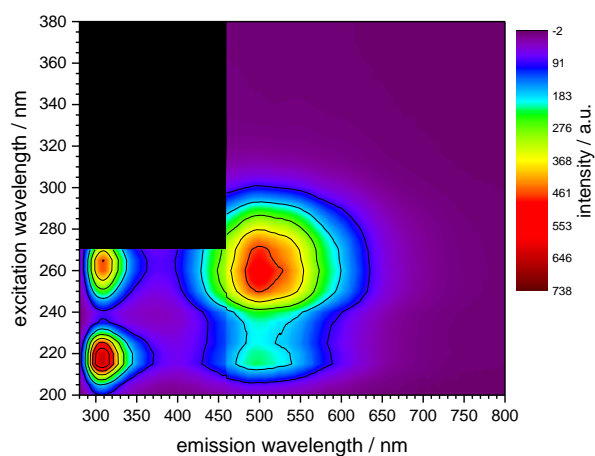

Fig. S5: Static excitation/emission spectrum of **1** in acetonitrile solution at room temperature, concentration set to 0.014 mg/mL (11  $\mu\text{mol/L}$ ). Note that at high concentration used in Ref. [1] (ca. 1 mmol/L) (i) the apparent luminescence peak at 500 nm is red-shifted to ca. 600 nm, and (ii) the excitation spectrum (for luminescence at 600 nm) peaks at ca. 350 nm.

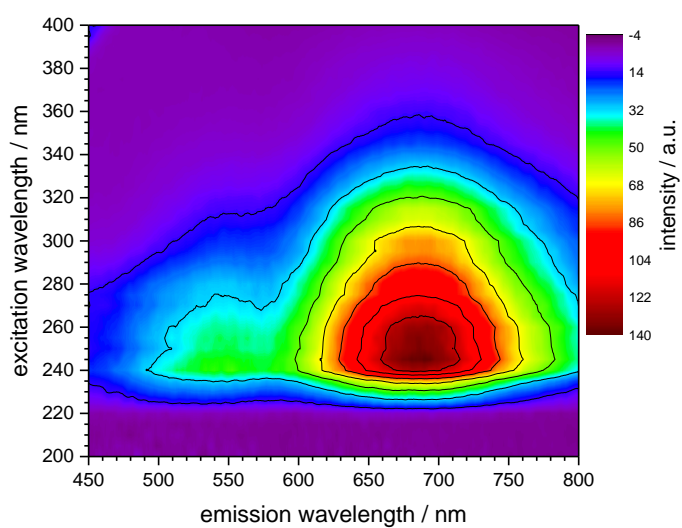

Fig. S6: Static excitation/emission spectrum of **1** in dichloromethane solution at room temperature, concentration set to 0.07 mg/mL (51  $\mu$ mol/L). Note that at high concentration used in Ref. [1] (ca. 1 mmol/L) (i) the apparent luminescence peak at 685 nm is blue-shifted to ca. 600 nm, and (ii) the excitation spectrum (for luminescence at 600 nm) peaks at ca. 350 nm.

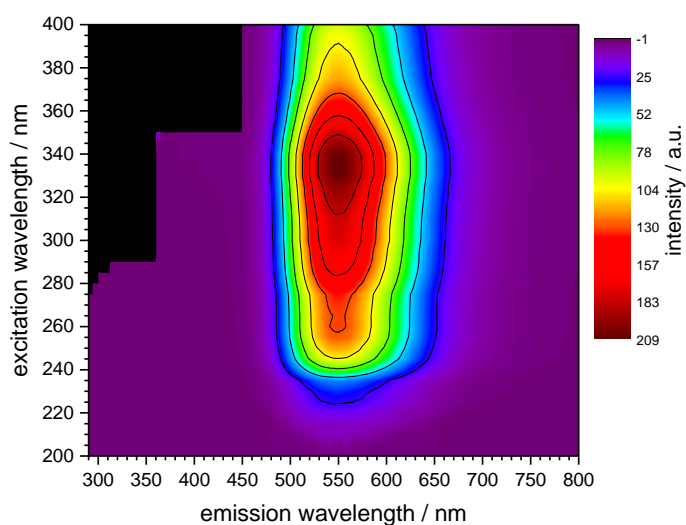

Fig. S7: Static excitation/emission spectrum of **1** as neat film at room temperature.

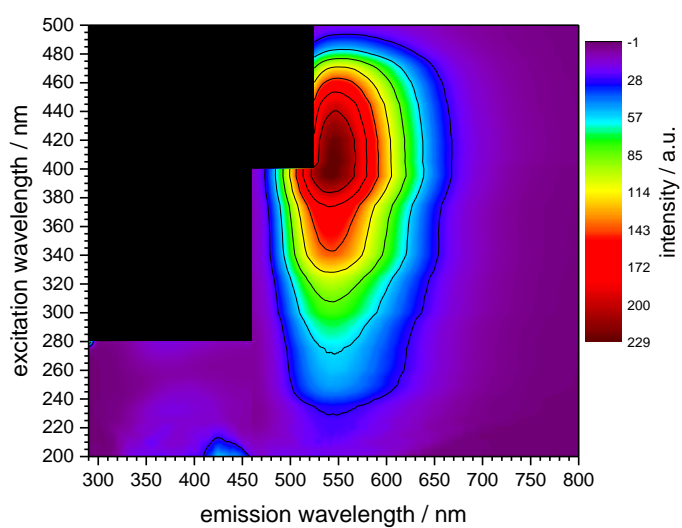

Fig. S8: Static excitation/emission spectrum of **1** as neat pellet at room temperature.

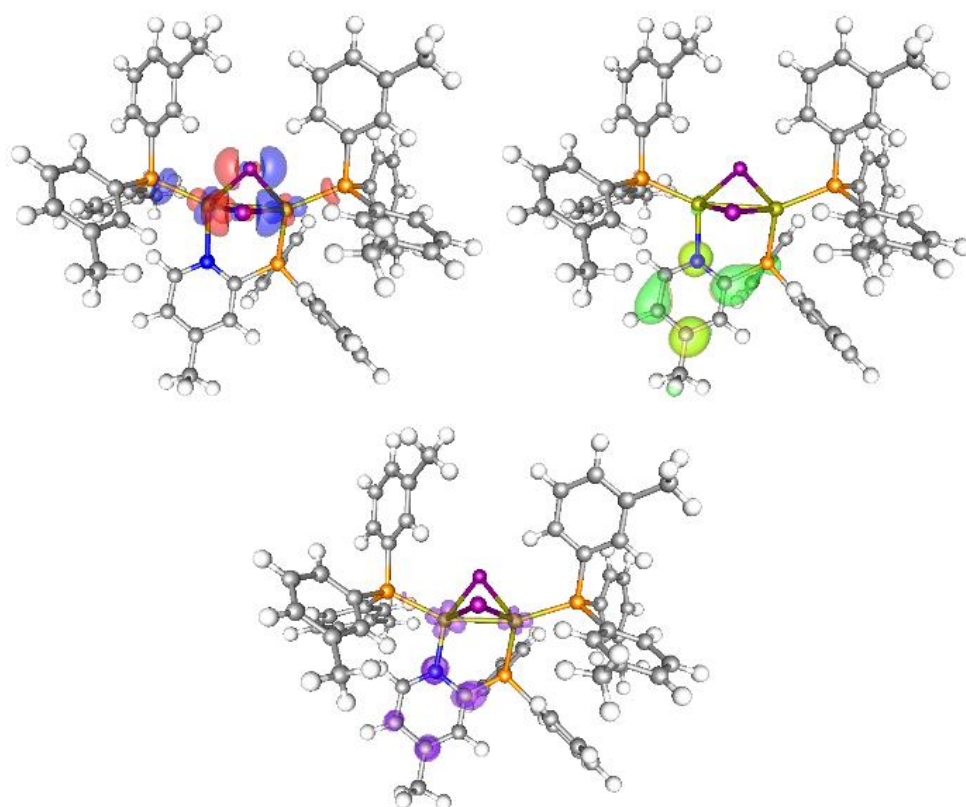

Fig. S9: Top: HOMO (left) and LUMO (right) of **1**. Bottom: Spin density in the  $T_1$  state, calculated with DFT/B3LYP/def2-TZVP.

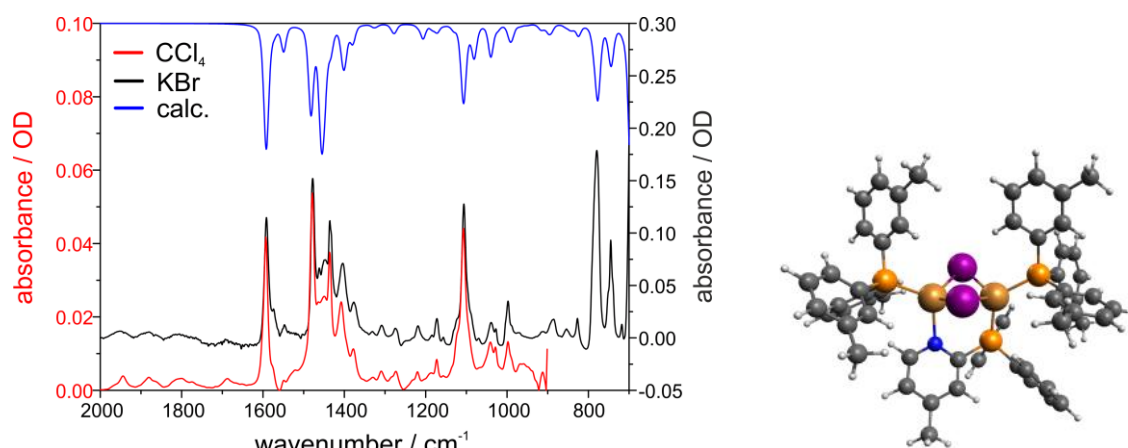

Fig. S10: Ground state FTIR spectrum of **1** in CCl<sub>4</sub> (red) and of **1** as KBr-pellet (black) at room temperature in comparison with calculated vibrational spectrum (blue) ( $S_0$ , DFT/B3LYP/def2-TZVP, x-axis scaled by 0.975, FWHM = 15 cm<sup>-1</sup>); calculated molecular structure of **1** in the electronic ground state (right).



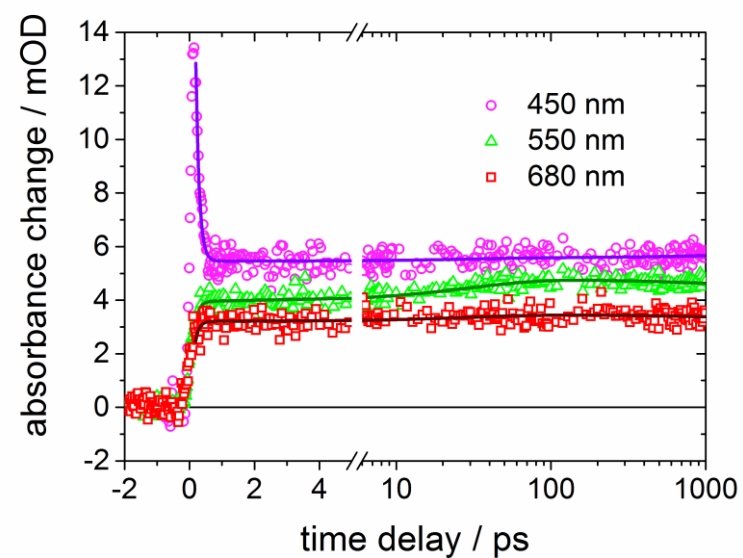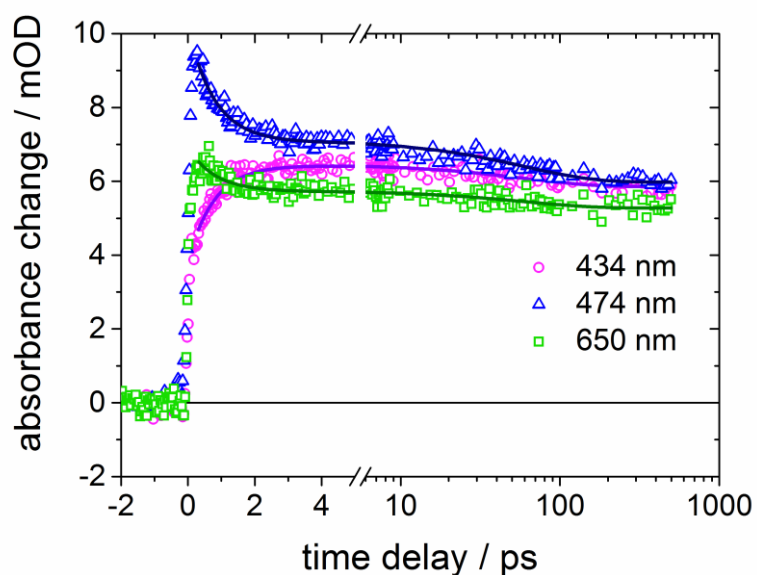

Fig. S11: Top: Selected time traces of fs transient absorption (TA) experiment on **1** in toluene solution at room temperature (excitation 350 nm) with triexponential fit (0.1, 25, 1500 ps). Bottom: Selected transients of fs-TA experiment on **1** in acetonitrile solution (excitation 350 nm) with biexponential fit (0.8, 59 ps).

Tab. S2: Luminescence lifetimes of **1** in toluene solution at room temperature.

| $\lambda_{\text{ex}}/\text{nm}$ | $\lambda_{\text{em}}/\text{nm}$ | $\tau_1/\text{ns}$ | $A_1/\%$ | $\tau_2/\text{ns}$ | $A_2/\%$ | $\tau_{\text{av}}/\text{ns}$ |
|---------------------------------|---------------------------------|--------------------|----------|--------------------|----------|------------------------------|
| 293                             | 677                             | 0.7                | 23.9     | 12.9               | 76.1     | 10.0                         |

Tab. S3: Luminescence lifetimes of **1** in acetonitrile solution at room temperature.

| $\lambda_{\text{ex}}/\text{nm}$ | $\lambda_{\text{em}}/\text{nm}$ | $\tau_1/\text{ns}$ | $A_1/\%$ | $\tau_2/\text{ns}$ | $A_2/\%$ | $\tau_{\text{av}}/\text{ns}$ |
|---------------------------------|---------------------------------|--------------------|----------|--------------------|----------|------------------------------|
| 256                             | 577                             | 3.1                | 86.9     | 13.0               | 13.1     | 4.4                          |
| 273                             | 577                             | 3.2                | 85.9     | 10.9               | 14.1     | 4.3                          |

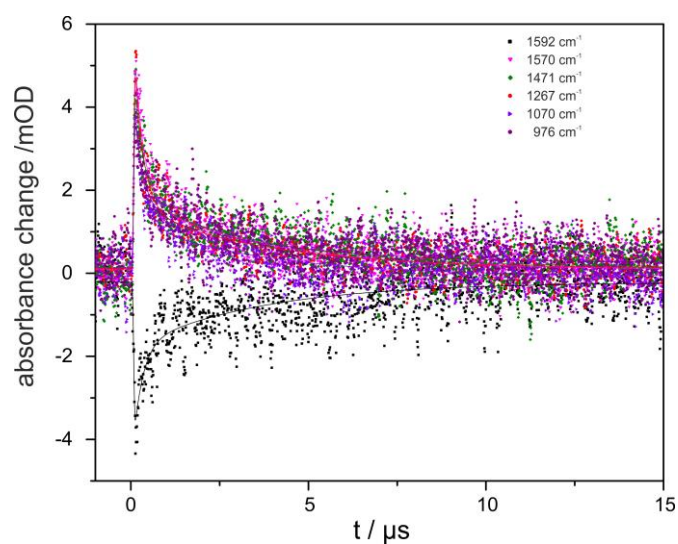

Fig. S12: Temporal evolution of step-scan FTIR absorbance changes of **1** as KBr-pellet at room temperature of 6 vibrational bands (dots) and biexponential fits (convolution with Gaussian pulse shape) (solid lines) that resulted in two decay times of  $\tau_1 = 257 \pm 14$  ns and  $\tau_2 = 3624 \pm 132$  ns.

Tab. S4: Characterization of vibrational modes of **1**.

| $\tilde{\nu}$ /cm <sup>-1</sup><br>ground<br>state | $\tilde{\nu}$ /cm <sup>-1</sup><br>excited<br>state | Character of the vibration                                                                                                   |
|----------------------------------------------------|-----------------------------------------------------|------------------------------------------------------------------------------------------------------------------------------|
| 1592                                               |                                                     | C <sub>3</sub> -C <sub>4</sub> / C <sub>5</sub> -C <sub>6</sub> stretching, accompanied with C-H scissoring, in the pyridine |
| 1478                                               | 1471                                                | C-H rocking in the tolyl moieties                                                                                            |
| 1436                                               | 1427                                                | C-H scissoring of the methyl groups of the tolyl moieties                                                                    |
| 1405                                               |                                                     | C-H scissoring in the tolyl moieties                                                                                         |
| 1173                                               | 1165                                                | C-H scissoring of tolyl and pyridine                                                                                         |
| 1106                                               |                                                     | C-H scissoring of tolyl, coupled over all tolyl groups                                                                       |
| 1038                                               |                                                     | C-H twisting of the methyl group on the pyridine                                                                             |
| 998                                                | 976                                                 | Breathing of the phenyl groups                                                                                               |

Exclusive excited state vibrations

|      |                                                                                                                              |
|------|------------------------------------------------------------------------------------------------------------------------------|
| 1570 | C-C stretching, accompanied with C-H scissoring, in the tolyl moieties                                                       |
| 1518 | C <sub>3</sub> -C <sub>4</sub> / C <sub>5</sub> -C <sub>6</sub> stretching, accompanied with C-H scissoring, in the pyridine |
| 1267 | Asymmetric N-C <sub>2</sub> /N-C <sub>6</sub> stretching vibration, accompanied with C-H scissoring, in the pyridine         |
| 1213 | Breathing of the pyridine ring, accompanied with C <sub>6</sub> -P stretching vibration                                      |

Tab. S5: Change of geometrical parameters concerning the copper – iodide core with transition from the S<sub>0</sub> structure to the T<sub>1</sub> structure, calculated with DFT/B3LYP/def2-TZVP. The numbers of the atoms are shown in the figure above.

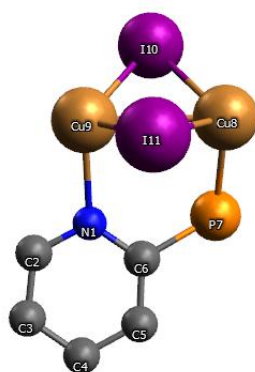

| parameter                    | difference |
|------------------------------|------------|
| $d(\text{N1-C6})$            | +0.07 Å    |
| $d(\text{Cu8-Cu9})$          | -0.25 Å    |
| $d(\text{Cu9-N1})$           | -0.27 Å    |
| $\angle(\text{Cu9-I10-Cu8})$ | -6.5°      |
| $\angle(\text{Cu9-I11-Cu8})$ | -6.8°      |

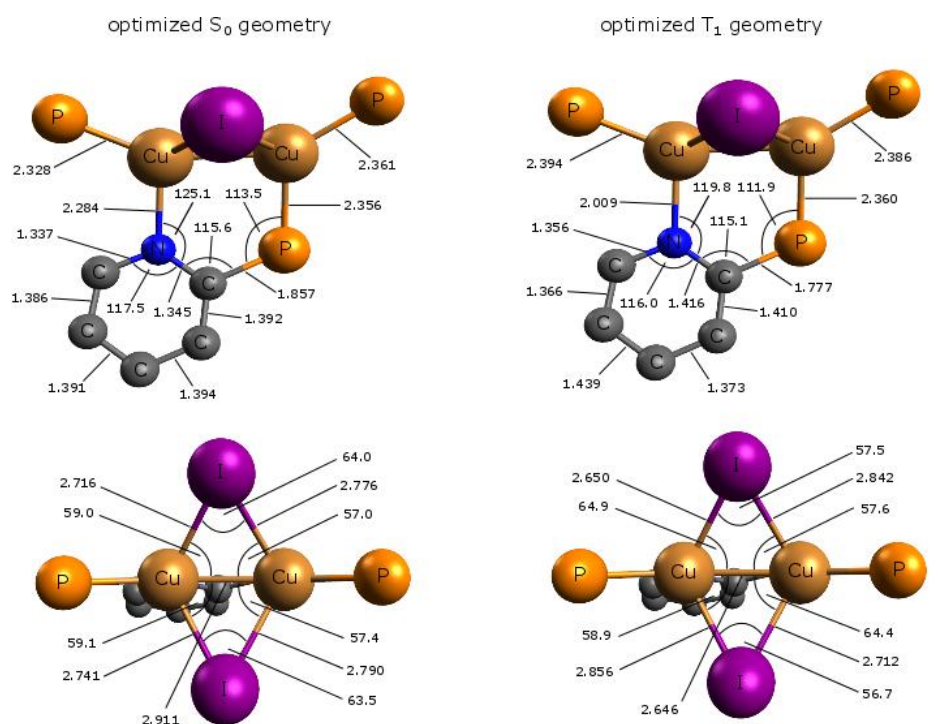

Fig. S13: Bond lengths (in Å) and angles (in °) in the central  $\text{Cu}_2\text{I}_2$  unit in the  $S_0$  and  $T_1$  electronic state, calculated with DFT/B3LYP/def2-TZVP.

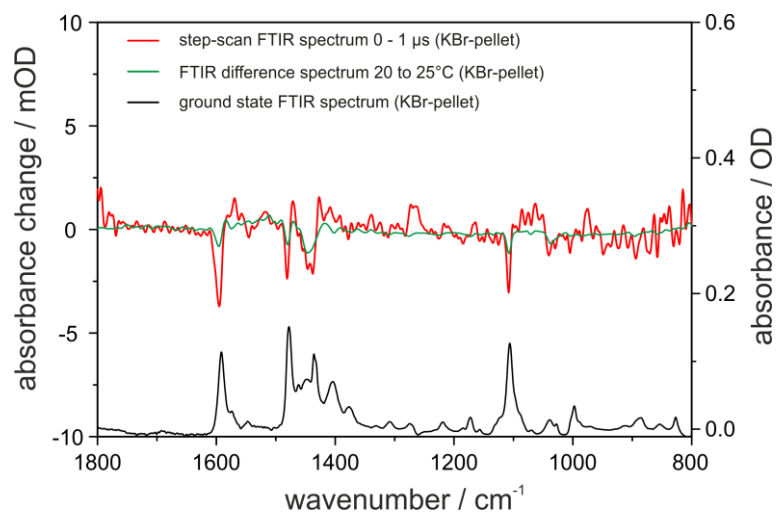

Fig. S14: Ground state FTIR spectrum of **1** as KBr-pellet (black); step-scan FTIR difference spectrum (red) in the first microsecond after excitation with 355 nm (red); change in absorbance through temperature rise of 5 K (green).

Tab. S6: Luminescence lifetimes of **1** as KBr-pellet at room temperature.

| $\lambda_{\text{ex}}/\text{nm}$ | $\lambda_{\text{em}}/\text{nm}$ | $\tau_1/\mu\text{s}$ |
|---------------------------------|---------------------------------|----------------------|
| 345                             | 550                             | 4.4                  |
| 293                             | 550                             | 4.5                  |
| 273                             | 550                             | 4.7                  |

Tab. S7: Luminescence lifetimes of **1** as neat film at room temperature.

| $\lambda_{\text{ex}}/\text{nm}$ | $\lambda_{\text{em}}/\text{nm}$ | $\tau_1/\mu\text{s}$ | $A_1/\%$ | $\tau_2/\mu\text{s}$ | $A_2/\%$ | $\tau_{\text{av}}/\mu\text{s}$ |
|---------------------------------|---------------------------------|----------------------|----------|----------------------|----------|--------------------------------|
| 389                             | 550                             | 1.03                 | 14       | 4.23                 | 86       | 3.8                            |
| 345                             | 550                             | 0.76                 | 23       | 3.62                 | 77       | 3.0                            |
| 313                             | 550                             | 0.69                 | 23       | 3.61                 | 77       | 2.9                            |
| 293                             | 550                             | 0.63                 | 24       | 3.54                 | 76       | 2.8                            |
| 273                             | 550                             | 0.61                 | 25       | 3.43                 | 75       | 2.7                            |
| 256                             | 550                             | 0.56                 | 25       | 3.45                 | 75       | 2.7                            |

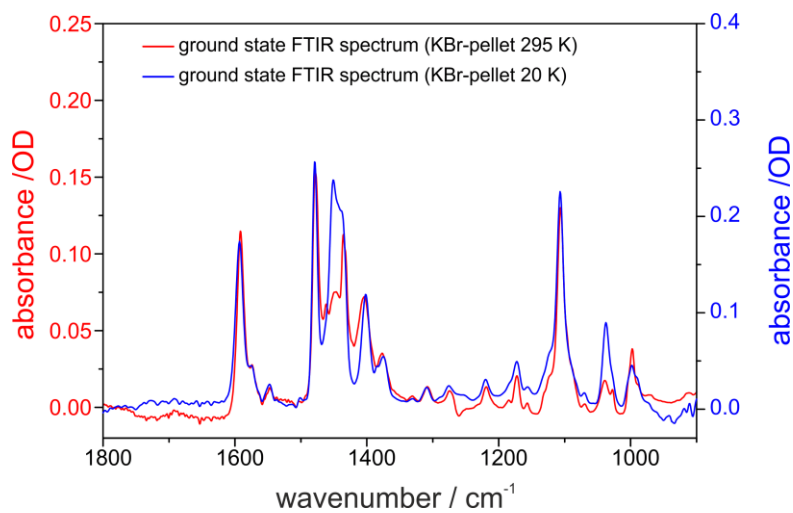

Fig. S15: Ground state FTIR spectrum of **1** as KBr-pellet at room temperature (295 K) (red) and at 20 K (blue).

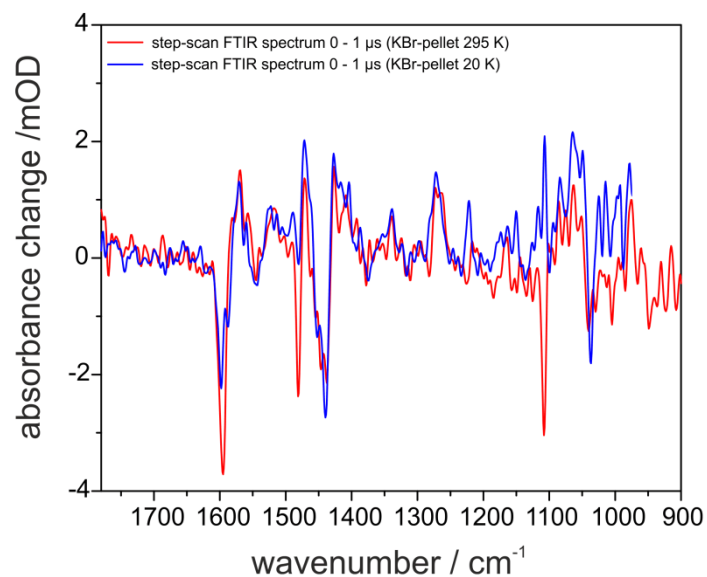

Fig. S16: Step-scan FTIR difference spectrum of **1** as KBr-pellet in the first microsecond after excitation with 355 nm, at 295 K (red) and at 20 K (blue).

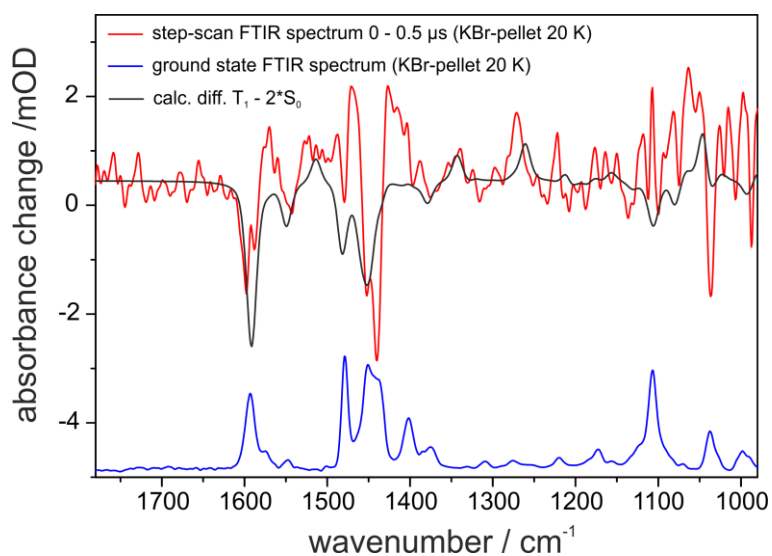

Fig. S17: Step-scan FTIR difference spectrum of **1** as KBr-pellet at 20 K in the first 500 ns after excitation with 355 nm (red); DFT calculation of T<sub>1</sub> state minus 2\*S<sub>0</sub> state (black); ground state FTIR spectrum as KBr-pellet at 20 K (blue); calculations: DFT/B3LYP/def2-TZVP, x-axis scaled by 0.975, FWHM = 15 cm<sup>-1</sup>.

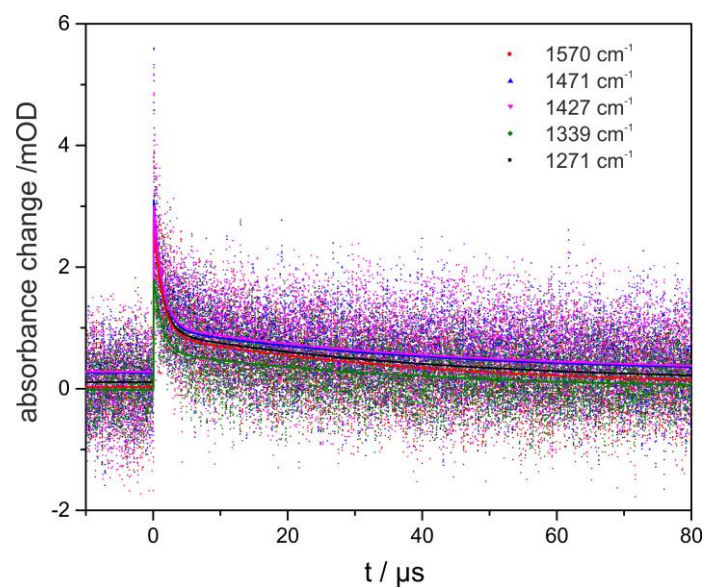

Fig. S18: Temporal evolution of step-scan FTIR absorbance changes of **1** as KBr-pellet at 20 K of 5 vibrational bands (dots) and biexponential fits (convolution with Gaussian pulse shape) (lines).  $\tau_1 = 1291 \pm 49$  ns,  $\tau_2 = 40 \pm 1.2$   $\mu$ s.

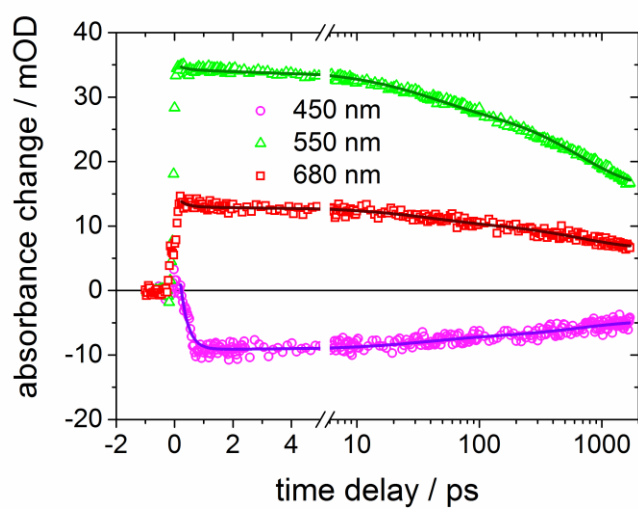

Fig. S19: Selected transients of fs-TA experiment on **1** as neat film at room temperature (excitation 350 nm) with triexponential fit (0.3, 35, 670 ps).

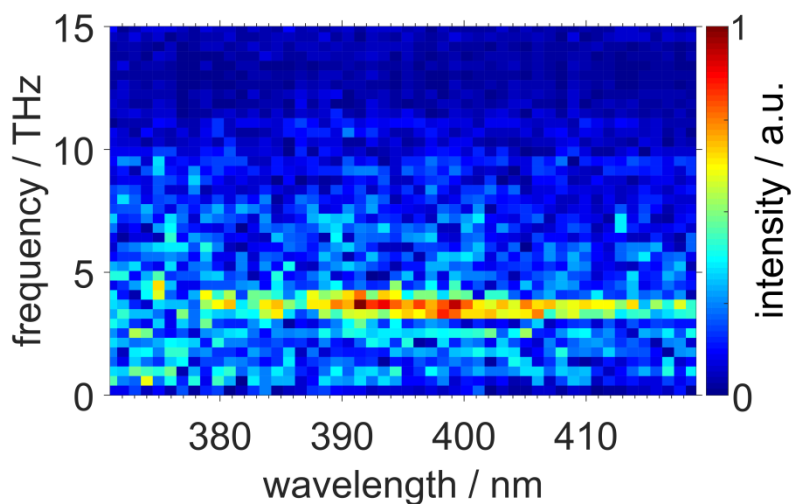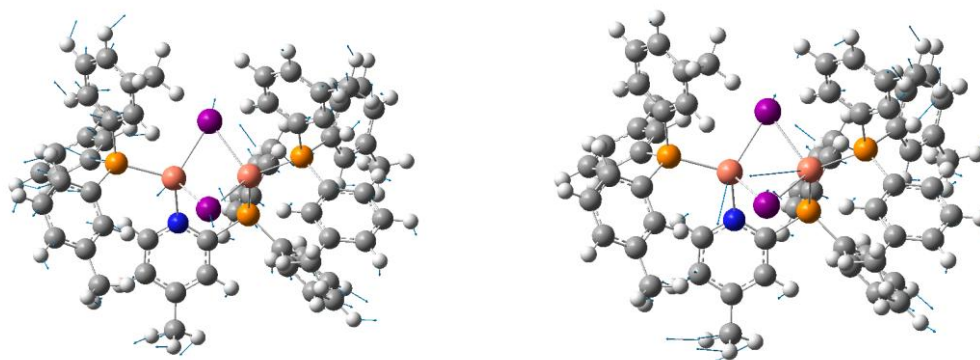

Fig. S20: Top: Fast Fourier transform (FFT) of fs-TA data of **1** in neat film at room temperature indicates coherent nuclear oscillation between ca. 390-400 nm. For more information cf. main text. Bottom: Representation of low-frequency vibrational modes in the electronic ground state of **1** (calculated by DFT) with wavenumbers ( $129\text{ cm}^{-1}$  left,  $111\text{ cm}^{-1}$  right) close to that ( $115\text{ cm}^{-1}$ ) observed after photoexcitation of **1** as neat film.

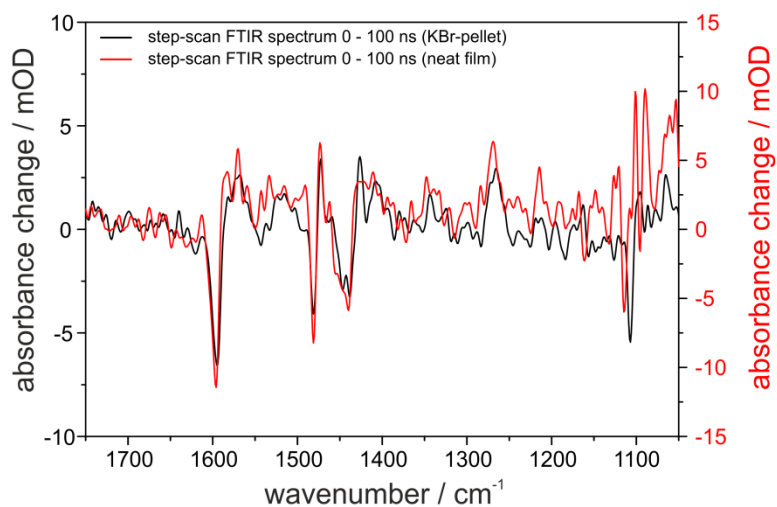

Fig. S21: Step-scan FTIR difference spectrum of **1** as KBr pellet (black) and as neat film (red) at room temperature in the first 100 ns after excitation with 355 nm.



Tab. S8: Vertical excitation energies for the  $S_0$  geometry and corresponding oscillator strengths, calculated with TD-DFT/B3LYP/def2-TZVP.

| Excited state | $\Delta E/\text{eV}$ | $\tilde{\nu}/\text{cm}^{-1}$ | $\lambda/\text{nm}$ | oscillator strength |
|---------------|----------------------|------------------------------|---------------------|---------------------|
| $S_1$         | 2.571                | 20738                        | 482                 | 0.0012              |
| $S_2$         | 2.867                | 23123                        | 432                 | 0.0041              |
| $S_3$         | 2.900                | 23387                        | 428                 | 0.0116              |
| $S_4$         | 2.959                | 23868                        | 419                 | 0.0009              |
| $S_5$         | 3.128                | 25228                        | 396                 | 0.0028              |
| $S_6$         | 3.248                | 26193                        | 382                 | 0.0029              |
| $S_7$         | 3.271                | 26381                        | 379                 | 0.0021              |
| $S_8$         | 3.284                | 26488                        | 378                 | 0.0040              |
| $S_9$         | 3.304                | 26648                        | 375                 | 0.0166              |
| $S_{10}$      | 3.321                | 26792                        | 373                 | 0.0033              |

| Excited state | $\Delta E/\text{eV}$ | $\tilde{\nu}/\text{cm}^{-1}$ | $\lambda/\text{nm}$ | oscillator strength |
|---------------|----------------------|------------------------------|---------------------|---------------------|
| $T_1$         | 2.554                | 20600                        | 485                 | 0.0058              |
| $T_2$         | 2.770                | 22341                        | 447                 | 0.0495              |
| $T_3$         | 2.835                | 22864                        | 437                 | 0.0216              |
| $T_4$         | 2.946                | 23765                        | 421                 | 0.0043              |
| $T_5$         | 3.103                | 25026                        | 400                 | 0.0247              |
| $T_6$         | 3.154                | 25438                        | 393                 | 0.0599              |
| $T_7$         | 3.170                | 25568                        | 391                 | 0.1029              |
| $T_8$         | 3.226                | 26016                        | 384                 | 0.1143              |
| $T_9$         | 3.250                | 26211                        | 382                 | 0.0268              |
| $T_{10}$      | 3.263                | 26341                        | 380                 | 0.0160              |

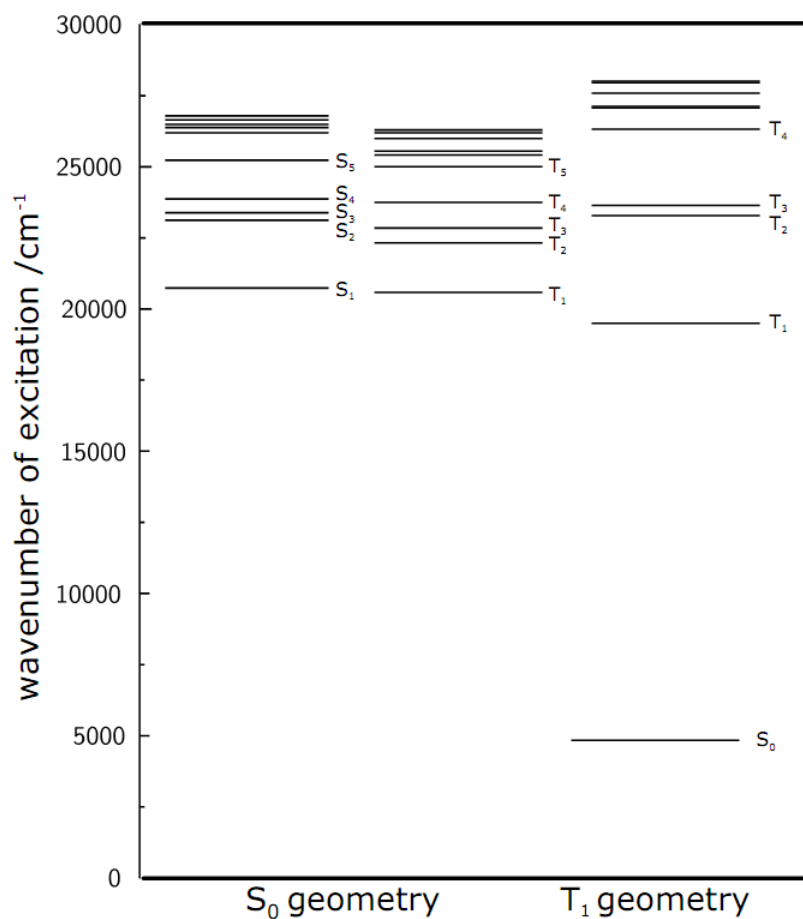

Fig. S22: Vertical excitation energies for S<sub>0</sub>- and T<sub>1</sub>-geometry, calculated with TD-DFT/B3LYP/def2-TZVP.

#### References:

[1] Wallesch, M.; Verma, A.; Flechon, C.; Flügge, H.; Zink, D. M.; Seifermann, S. M.; Navarro, J. M.; Vitova, T.; Göttlicher, J.; Steininger, R. *et al.* Towards Printed Organic Light-Emitting Devices: A Solution-Stable, Highly Soluble CuI -NHetPHOS. *Chem. Eur. J.* **2016**, 22, 16400–16405.
